## Title: Prevalence, risk factors, and consequences of hypothyroidism among pregnant women in the health region of Lleida: a cohort study

Júlia Siscart<sup>1,2,3,4\*</sup>, Dani Perejón<sup>1,3,4,6</sup>, M. Catalina Serna<sup>1,3,5,6\*</sup>, Míriam Orós<sup>1,3,4,6</sup>, Pere Godoy<sup>5,7,8</sup>, Eduard Solé<sup>9</sup>.

### • Affiliations

- Primary Care Research Institute IDIAP Jordi Gol, Catalan Institute of Health, Lleida, Spain
- Serós Health Center, Catalan Institute of Health, Lleida, Spain
- Family Medicine Department, University of Lleida, Lleida, Spain
- Therapeutic research group in primary care (GRETAP), Catalan Institute of Health, Lleida, Spain
- School of Medicine. Lleida University. Lleida. Spain Universitat de Lleida, Lleida, Spain
- Eixample Health Center, Catalan Institute of Health, Lleida, Spain
- Institut de Recerca Biomèdica (IRBLleida), Lleida, Spain
- CIBER of Epidemiology and Public Health (CIBERESP), Instituto Carlos III, Madrid, Spain
- Pediatric Service of Hospital Arnau de Vilanova of Lleida, Lleida, Spain

### • Contributions

JS and DP conceptualized the study, analyzed the data, and wrote the first draft of the manuscript; MCS, PG, ES contributed to the design of the study, data management, and manuscript development and review; DP and MO also contributed to the design of the study, and to the creation of data bases and data analysis. All authors read and approved the final manuscript.

### • \*Corresponding author

Júlia Siscart Viladegut  
School of Medicine. Lleida University. Lleida, Spain.  
Email: [jvsiscart.lleida.ics@gencat.cat](mailto:jvsiscart.lleida.ics@gencat.cat)

Maria Catalina Serna Arnaiz  
School of Medicine. Lleida University. Lleida  
Plaça de Víctor Siurana, 1, 25003 Lleida (Spain)  
Email: [catalina.serna@udl.cat](mailto:catalina.serna@udl.cat)

### • Competing interests

- The authors declare they have no competing interests.

## PREVALENCE, RISK FACTORS, AND CONSEQUENCES OF HYPOTHYROIDISM AMONG PREGNANT WOMEN IN THE HEALTH REGION OF LLEIDA: A COHORT STUDY

### Abstract

**Background:** Primary maternal hypothyroidism is defined as the increase of TSH levels in serum during pregnancy. Hypothyroidism in pregnancy is the second most common endocrine disease, after diabetes mellitus, with a prevalence ranging between 3.2 and 5.5%. Its variability depends on ethnical differences. Hypothyroidism in pregnancy is associated with other chronic diseases and fetal and maternal outcomes.

**Objective:** To analyze the prevalence of hypothyroidism among multiethnic pregnant women, and to evaluate the comorbidity with chronic diseases and outcomes leaded during pregnancy and newborn.

**Methods:** Retrospective observational cohort study in pregnant women during the years 2012-2018 in the health region of Lleida. The relationship of hypothyroidism with different variables was analyzed by calculating the adjusted odds ratio (aOR) and the 95% confidence intervals (CI) with multivariate logistic regression models.

**Results:** We analyzed a sample of 17177 pregnant women, which represents more than 92% of the total of pregnant women in the health region of Lleida. The annual prevalence of hypothyroidism was 5.7-7.1%. According to the region of origin, the lowest prevalence was found in the population from Sub Saharian Africa (2.1%), while the highest was from Asia and the Middle East (8.6%). Other factors associated with hypothyroidism were age, hypertension, diabetes mellitus, and dyslipidemia. In addition, we did not observe an effect of hypothyroidism on the course of pregnancy, childbirth, and on the newborn. Finally, there was a good control of the disease during pregnancy.

**Conclusions:** The prevalence of hypothyroidism in pregnancy was 6,5% in this study which depends on the country of origin, lower values were found in Sub Saharian African women and higher in those from Asia and the Middle East. Hypothyroidism was associated with age, diabetes mellitus, arterial hypertension, or dyslipidemia, and was not related to the Apgar score or the weight of the newborn.

**Keywords:** Pregnancy, hypothyroidism, prevalence, outcomes, risk factors.

- Introduction

Hypothyroidism is defined as a decreased production of thyroid hormone that may be due to primary damage on the thyroid gland or secondary as a result of hypothalamic or pituitary disease (1). There are two types of hypothyroidism: frank, with a deficiency of thyroxine (T4) and the presence of symptoms; and subclinical, with normal T4 values and high thyrotropin values (TSH) and usually without symptoms (2).

During pregnancy, hormonal changes also affect the activity of the thyroid gland. First, glomerular filtration increases and so iodine clearance does it too. Iodine is an essential mineral in the metabolism of the thyroid hormones triiodothyronine (T3) and thyroxine (T4). Its reserves depend on its daily intake, thyroid catabolism, and its elimination via kidneys and its increased clearance is compensated by a higher production of T3 and T4 (3). Second, the human chorionic gonadotropin hormone (hCG) increases. This glycoprotein shares the alpha subunit with TSH, the hypothalamic hormone that stimulates the pituitary gland and causes the thyroid gland to generate T3 and T4. Because of this similarity, hCG stimulates the hypothalamic-pituitary-thyroid axis, which produces an increase in T3 and T4 hormones in blood (4). Finally, the increase of estrogen stimulates the production of thyroxine-binding

globulin (TBG), which, when bound to T4, causes a deficiency of free T4 that the hypothalamus-pituitary-thyroid cycle tries to compensate for (5,6).

Hypothyroidism is the second most prevalent endocrine disease after diabetes mellitus in pregnancy (7). In different studies, the prevalence of the disease goes between 2 and 3% (8): 0.2-0.5% for its clinical form and 0.25-5% for the subclinical one (9-11). Ethnic differences have been described in TSH values and, therefore, in the prevalence of hypothyroidism (12).

In many studies, clinical and subclinical hypothyroidism has been associated with side effects in pregnancy, such as repeated miscarriage, preeclampsia or eclampsia, and gestational hypertension and diabetes. It has also been observed an increase of the risk of neonatal death, placental abruption, low weight birth, prematurity, fetal distress, intrauterine death, and intellectual deterioration (13-17).

In this context, we aimed to analyze the prevalence of hypothyroidism among multiethnic pregnant women in the health region of Lleida and its association with chronic disease and outcomes during pregnancy.

- Materials and methods

- Study design and data collection:

We carried out a retrospective observational cohort study among pregnant women in the health region of Lleida during the years 2012-2018.

The data of women who had given birth at the Arnau de Vilanova Hospital between January 1st, 2012 and December 31st, 2018 were obtained through the CMBD database ("Conjunt Minim de Base de Dades"). In particular, the data of all the eligible patients assigned to a primary care unit derived from the computerized clinical history database E-CAP of the Catalan Health Institute; and data from Social Security prescriptions derived from the database of the Servei Català de Salut. In the Health Region of Lleida, a universal screening of thyroid function is carried out during the first trimester of pregnancy by determining the levels of TSH and T4.

This article is part of the Iler Pregnancy project, retrospective cohort study performed in Lleida with the aim of evaluating the prevalence of chronic diseases in pregnancy (hypothyroidism, depression, diabetes mellitus and obesity) and therapeutic adherence to prescribed drugs (18).

- Study population:

Women who have had a birth at the Arnau de Vilanova University Hospital in Lleida between January 1st, 2012 and December 31st, 2018 were included in the study. Women who did not belong to Lleida health region were excluded. To evaluate the representativeness of the sample, we calculated the percentage of pregnant women studied compared to the total of pregnant women in the health region of Lleida. Data were obtained from the database of the "Instituto Statistics of Catalonia" (Idescat) (Table 1). We included data from the date of the last period to the date of delivery.

| Year | Deliveries in our sample | Deliveries from Idescat | Sample/Idescat |
|------|--------------------------|-------------------------|----------------|
|------|--------------------------|-------------------------|----------------|

|      |      |      |     |
|------|------|------|-----|
| 2012 | 3635 | 3788 | 96% |
| 2013 | 3370 | 3535 | 95% |
| 2014 | 3308 | 3592 | 92% |
| 2015 | 3162 | 3426 | 92% |
| 2016 | 3180 | 3283 | 97% |
| 2017 | 3034 | 3197 | 95% |
| 2018 | 3001 | 3029 | 99% |

The following variables were recorded: presence of hypothyroidism, which corresponds to code E03.9 and E02 of the ICD-10; age; and levels of TSH and T4 in each trimester of pregnancy according to the laboratory reference values (Table 2). These hormonal levels were measured by immunoassay of enzyme chemiluminescence with the Beckman Coulter DXI 800 analyzer.

| Trimester | TSH (nmol/L) | T4I (nmol/L) |
|-----------|--------------|--------------|
| First     | 0.50-3.70    | 6.70-16.30   |
| Second    | 0.31-4.35    | 5.80-13.90   |
| Third     | 0.41-5.18    | 6.10-15.80   |

Other variables were also studied: region of origin (Sub Saharian Africa, Latin America, Asia and the Middle East, West Europe, Eastern Europe, and Maghreb) (19); body mass index (BMI); number of pregnancy and twin pregnancy; abortions; prolonged or pre-term delivery; cesarean section; diabetes mellitus (code O24.9 at CIE-10.); arterial hypertension (code I10-I16 at I'ICD-10); dyslipidemia (code E78 at I'ICD-10); depression (codes F32.0-F32.9, F33.0-F33.3, F33.8, F33.9, F34.1, or F41.2 at I'ICD-10); preeclampsia; risk during pregnancy; newborn weight, classified as low weight (<2500 gr), normal weight (2500-4000 gr), and macrosomia (>4000 gr) (20); and score of the Apgar test in the first minute and in the fifth, classified as good when  $\geq 7$  points and bad when <7 points (21).

○ Data analysis:

We performed a descriptive analysis. Numerical variables were described by mean and standard deviation, and categorical variables by absolute and relative frequencies. Differences between groups were evaluated using Student's t-test or Chi-square test, depending on whether the variables were numerical or categorical, respectively. The relationship between hypothyroidism and other variables was analyzed using multivariate logistic regressions and adjusted Odds Ratio (OR) and the respective 95% confidence intervals (CI) were reported.

- Ethical aspects

This study was approved by the ethics and clinical research committee at the Institut d'Investigació IDIAP Jordi Gol under the code 19/195-P and carried out in accordance with the principles of the Declaration of Helsinki. Information was obtained from electronic medical records stored in the centralized ECAP database and extracted by the Department of Healthcare Evaluation and Research Management. Therefore, it was not necessary to ask participants for their informed consent. The variables in the ECAP database were processed anonymously and with full confidentiality guarantees as established by national law and Regulation 2016/679 of the European Parliament and of the Council on the protection of natural people with regard to the processing of personal data, and to the free movement of such data.

- Results

We started with a sample of 21375 women who had given birth at the Arnau de Vilanova Hospital in Lleida between 2012 and 2018 (both included). Of this sample 1625 women were excluded because they did not have a personal identification code (CIP), and 2573 because many data from the clinical history were missing. The final sample included were 17177 patients (Figure 1).

1127 women (6.5%) had a diagnosis of hypothyroidism, of whom 0.07% had clinical hypothyroidism, and 6.45% subclinical.

Every year the prevalence of hypothyroidism varied between 5.7% and 7.1% (Table 3), and patients showed a higher mean age in comparison to the rest:  $31.7 \pm 5.7$  years and  $30.6 \pm 5.9$  years, respectively ( $p < 0.05$ ). The mean BMI of patients was  $25 \pm 5.2$ .

| Year of delivery | Pregnant women with hypothyroidism (N: 1127) | Pregnant women studied (N: 17177) |
|------------------|----------------------------------------------|-----------------------------------|
| 2012             | 158 (5.67%)                                  | 2783                              |
| 2013             | 173 (6.85%)                                  | 2525                              |
| 2014             | 161 (6.46%)                                  | 2491                              |
| 2015             | 166 (6.86%)                                  | 2419                              |
| 2016             | 170 (7.03%)                                  | 2418                              |
| 2017             | 165 (7.12%)                                  | 2317                              |
| 2018             | 134 (6.03%)                                  | 2224                              |

According to the region of origin, the highest percentages found were 71.4% from West European patients, 11.2% from Maghreb, 8.5% from Eastern Europe, and 5.1% from Latin America. A total of 402 pregnancies (39.5%) were classified as not at risk, 211 (20.7%) at medium risk, 370 (36.3%) at high risk, and a total of 36 (3.5%) at very high risk. 34 patients (3.9%) had abortions, 53 (6.2%) pre-term deliveries, 24 (2.8%) prolonged deliveries, and 751 (87.1%) delivered at term. Caesarean sections were performed in 189 patients (16.8%). Around 87% of the

newborns from mothers either with or without hypothyroidism had normal weight, and no differences were observed in the percentages of newborns that were underweight or had macrosomia. Finally, no statistically significant differences were detected with the Apgar test at the first and fifth minutes between newborn from patients and from the rest of women (Table 4).

Thyroid hormone treatment was prescribed in 50.3% of the patients diagnosed with hypothyroidism. Among them, the mean adherence score was  $79.6 \pm 22.2$ , and 54% of these presented high adherence. Specifically, during the years of the study, 40.4-64.7% of the treated patients showed high adherence.

| Table 4. Characteristics of patients with hypothyroidism |                                  |                               |         |
|----------------------------------------------------------|----------------------------------|-------------------------------|---------|
|                                                          | Without hypothyroidism (N:16050) | With hypothyroidism (N: 1127) | P value |
| Age of the patients                                      | 30.6 (SD 5.9)                    | 31.7 (SD5.7)                  | < 0.001 |
| Body mass index (BMI)                                    | 24.9 (SD 4.9)                    | 25.0 (SD 5.2)                 | 0.364   |
| Region of origin                                         |                                  |                               | < 0.001 |
| Sub Saharian Africa                                      | 822 (5.9%)                       | 18 (1.9%)                     |         |
| Latin America                                            | 668 (4.8%)                       | 49 (5.1%)                     |         |
| Asia and the Middle East                                 | 203 (1.5%)                       | 19 (1.9%)                     |         |
| West Europe                                              | 8768 (62.5%)                     | 693 (71.4%)                   |         |
| Eastern Europe                                           | 1451 (10.3%)                     | 82 (8.45%)                    |         |
| Maghreb                                                  | 2124 (15.1%)                     | 109 (11.2%)                   |         |
| Pregnancy number                                         |                                  |                               | 0.001   |
| 1                                                        | 8472 (52.8%)                     | 537 (47.6%)                   |         |
| 2                                                        | 4802 (29.9%)                     | 379 (33.6%)                   |         |
| 3                                                        | 1725 (10.8%)                     | 145 (12.9%)                   |         |
| 4                                                        | 599 (3.7%)                       | 47 (4.2%)                     |         |
| >4                                                       | 452 (2.8%)                       | 19 (1.7%)                     |         |
| Twin pregnancy                                           |                                  |                               | 0.721   |
| No                                                       | 16019 (99.8%)                    | 1126 (99.9%)                  |         |
| Yes                                                      | 31 (0.2%)                        | 1 (0.1%)                      |         |
| Pregnancy risk                                           |                                  |                               | <0.001  |
| Risk free                                                | 7176 (50.1%)                     | 402 (39.5%)                   |         |
| Medium risk                                              | 4316 (30.1%)                     | 211 (20.7%)                   |         |
| High risk                                                | 2542 (17.8%)                     | 370 (36.3%)                   |         |
| Very high risk                                           | 280 (2.0%)                       | 36 (3.5%)                     |         |
| Duration of the pregnancy                                |                                  |                               | 0.867   |
| Abortion                                                 | 538 (4.4%)                       | 34 (3.9%)                     |         |
| Pre-term                                                 | 716 (5.9%)                       | 53 (6.2%)                     |         |
| Prolonged                                                | 304 (2.5%)                       | 24 (2.8%)                     |         |
| Full-term                                                | 10545 (87.%)                     | 751 (87.1%)                   |         |
| Cesarean                                                 |                                  |                               | 0.639   |
| No                                                       | 13263 (82.6%)                    | 938 (83.2%)                   |         |
| Yes                                                      | 2787 (17.4%)                     | 189 (16.8%)                   |         |
| Newborn weight                                           |                                  |                               | 0.824   |

|                                |               |             |       |
|--------------------------------|---------------|-------------|-------|
| Under weight                   | 850 (6.00%)   | 60 (6.17%)  |       |
| Macrosomia                     | 959 (6.77%)   | 61 (6.28%)  |       |
| Normal weight                  | 12352 (87.2%) | 851 (86.6%) |       |
| Apgar test in the first minute |               |             | 1.000 |
| ≥ 7                            | 13760 (97.5%) | 946 (97.5%) |       |
| < 7                            | 355 (2.5%)    | 24 (2.5%)   |       |
| Apgar test at the fifth minute |               |             | 0.699 |
| ≥ 7                            | 14006 (99.2%) | 964 (99.4%) |       |
| < 7                            | 111 (0.8%)    | 6 (0.6%)    |       |

Figure 2 shows a multivariate analysis of the prevalence of hypothyroidism compared to other predictor variables. We observed that diabetes mellitus, hypertension, and dyslipidemia predisposed to the development of the disease. No statistically significant differences were found in terms of weight and depression between women with and without hypothyroidism.

Figure 3 shows a multivariate analysis of the prevalence of the association of maternal and fetal risk factors in women with hypothyroidism. We observed that hypothyroidism predisposed to a high and very high risk pregnancy. The rest of the variables did not present a statistically significant association with hypothyroidism.

- Discussion

We analyzed a sample of 17177 pregnant women representing the 92% of the total of pregnant women in the health region of Lleida. The prevalence of hypothyroidism was 6.5% and the mean age of the patients with hypothyroidism was significantly higher ( $31.7 \pm 5.7$  years) than the mean age of the rest ( $30.6 \pm 5.9$  years). The annual distribution was 5.7-7.1%, depending on the origin of the pregnant woman. The lowest prevalence was found in the population from Sub Saharian Africa (2.1%), while the highest in those from Asia and the Middle East (8.6%). In this population the mean adherence score was  $79.6 \pm 22.2$ . Of these, 54% presented high adherence to treatment of hypothyroidism (18). Adherence to treatment and good control of TSH values in pregnancy may be related to the absence of adverse effects in the newborn. Other factors such as hypertension, diabetes mellitus, and dyslipidemia were found to be related to hypothyroidism. Regarding the association of hypothyroidism with maternal and fetal outcomes, no differences were observed between patients and the rest of pregnant women considering different aspects: miscarriage, pre-term delivery, caesarean section, birth weight, and Apgar results at first and fifth minutes.

The prevalence of hypothyroidism in our study was lower compared with the ones found by others such as: Nancy S. Pillai *et al.* (22), who reported in India a prevalence of 10.8%; Hatice Dulek *et al.* (8)<sup>12</sup>, who showed in Turkey values of prevalence at 8.9% for the subclinical form, and of 0.5% for the clinical; or L. Sletner *et al.* (23) describing in Norway a prevalence of 6.6% for subclinical hypothyroidism.

Age had already been described as a risk factor for developing hypothyroidism. Indeed, the "Guide to the diagnosis and treatment of thyroid diseases of endocrine metabolism" (24) advises screening for this disease from the age of 35; and the "Guide of the American Thyroid Association" (25) indicates being over 30 years of age as a risk factor. The prevalence of hypothyroidism has been associated with age in general population (26-28) and in pregnant woman as well (22).

The BMI of the patients without hypothyroidism was  $24.9 \pm 4.92$ , while BMI of the patients with hypothyroidism was  $25 \pm 5.24$ , these differences were not statistically significant. These results differ from the study conducted in India by Nancy S. Pillai *et al.* (22), as well as the one made by S.N. Ajmani *et al.*(29) , where it was observed that the higher the BMI was associated with



this disease. Furthermore, the study conducted by P. Gupta et al. (30) showed that high BMI were related with both hypothyroidism and hyperthyroidism.

Other variables significantly associated with hypothyroidism are arterial hypertension, diabetes mellitus, and dyslipidemia. Similar to our results, A.R Cappola *et al.* (31) and E. Berta *et al.* (32) and Y. Han *et al.* (33) related arterial hypertension to hypothyroidism. However, G. Li *et al.* (34) concludes that the incidence of arterial hypertension does not decrease with thyroid hormone replacement therapy.

Moreover, several studies have shown a relationship between diabetes mellitus and thyroid disorders (35,36). Finally, Dey *et al.* (37) described a relationship between hypothyroidism and dyslipidemia and concluded that good control of hypothyroidism favors good control of dyslipidemia.

Regarding the effects of the disease on the newborn, we did not observe differences in birth weight and Apgar Test during the first and fifth minutes. This can be caused by the early diagnosis and treatment of pregnant women with hypothyroidism, which results into good control of the disease, as we can see in the article of G.Li *et al.* (34). Various studies, like the one by Barišić T *et al.* (38), also suggested that early detection and optimization of the treatment for hypothyroidism before and during the first trimester reduces the risk of adverse outcomes.

- Difficulties and limitations of the study:

The strongest point of this study is the size of the sample that represents a high percentage of the population. Moreover, a universal screening has been performed in pregnant women, so it provides information on the majority of participants.

A possible limitation is the lack of data in some participants in our study, such as: women with two gestation periods during the same year, where the data could not have been separated; women for whom the Apgar Test and weight measurement of the newborn were not performed; and patients who carried out their follow-up in centers that do not belong to Social Insurance. It is estimated that these participants represent around 2.2% of the total in our health region; therefore, thanks to the universal coverage of the Spanish National Health System, it is unlikely that the results of the study have been affected by the missing data. Another limitation is represented by the fact that the presence of antithyroid antibodies was not analyzed because of the few existing data. Finally, we did not consider the socio-economical circumstances and environmental factors of the patients, that may also influence the results.

- Conclusions

The prevalence of hypothyroidism (6.5%) in pregnancy depends on ethnic origin. Sub Saharian African women presented lower hypothyroidism than those from Asia and the Middle East. A relationship of hypothyroidism with increasing age, hypertension, diabetes mellitus and dyslipidemia has been observed. However, no relation of hypothyroidism to the newborn's weight or Apgar score was appreciated. For all these reasons, we think that early detection and treatment of hypothyroidism, as well as control of therapeutic adherence, can help to prevent its adverse effects in pregnancy and outcomes in offspring.

- Acknowledgements

The authors would like to acknowledge Dr. Miquel Butí for his valuable contribution and support to design and create the database, Joaquim Sol for his contribution to the statistics analysis, and the Gol i Gurina Foundation.

- **Funding**

The authors declare no support from any organization for the submitted work; no financial relationships with organizations that might have an interest in the submitted work in the previous three years; and no other relationships or activities that could appear to have influenced the submitted work.

- **Ethics declarations**

This study was approved by the ethics and clinical research committee of the “Institute for Primary Health Care Research Jordi Gol i Gurina (IDIAPJGol)” under the code 19/195-P. The study was conducted in accordance with the principles of the Declaration of Helsinki. Pseudonymized retrospective descriptive cross-sectional study according to Additional Provision 17.2.d LOPD-GDD for research purposes, without the need to obtain the consent of the data holders, there is a technical and functional distance between the research team and the performer pseudonymization, and that the data is only accessible to the research team, and technical measures have been taken to prevent such re-identification and access by third parties through the CMBD database (“Conjunt Minim de Base de Dades”) the E-CAP computerized medical history database and the Catalan Health Service database.

- **Consent for publication**

Not Applicable

- **Competing interests**

The authors declare they have no competing interests.

- **Bibliography**

1. Chiovato L, Magri F, Carlé A. Hypothyroidism in Context: Where We've Been and Where We're Going. *Adv Ther.* 2019 Sep;36(Suppl 2):47-58. doi: 10.1007/s12325-019-01080-8. Epub 2019 Sep 4. PMID: 31485975; PMCID: PMC6822815.
2. Díez JJ, et al. Disfunción tiroidea y embarazo. *MedClin(Barc)* 2014
3. De Leo S1, Pearce EN2, et al. Autoimmune thyroid disease during pregnancy. *Lancet Diabetes Endocrinol.* 2018 Jul;6(7):575-586
4. Yamazaki K, Sato K, Shizume K, et al. Potent thyrotropic activity of human chorionic gonadotropin variants in terms of 125I incorporation and de novo synthesized thyroid hormone release in human thyroid follicles. *J Clin Endocrinol Metab* 1995; 80:473
5. Ain KB, Mori Y, Refetoff S. Reduced clearance rate of thyroxine-binding globulin (TBG) with increased sialylation: a mechanism for estrogen-induced elevation of serum TBG concentration. *J Clin Endocrinol Metab* 1987; 65:689
6. Gian Carlo Di Renzo. Good clinical practice advice: Thyroid and pregnancy. *Int J Gynecol Obstet* 2019; 144: 347–351 [DOI: 10.1002, ijgo.12745]

7. Han C, Li C, Mao J, Wang W, Xie X, Zhou W, Li C, Xu B, Bi L, Meng T, Du J, Zhang S, Gao Z, Zhang X, Yang L, Fan C, Teng W, Shan Z. High Body Mass Index Is an Indicator of Maternal Hypothyroidism, Hypothyroxinemia, and Thyroid-Peroxidase Antibody Positivity during Early Pregnancy. *Biomed Res Int*. 2015;2015:351831. doi: 10.1155/2015/351831. Epub 2015 Jul 27. PMID: 26273610; PMCID: PMC4530209
8. Dulek H, Vural F, Aka N, Zengin S. The prevalence of thyroid dysfunction and its relationship with perinatal outcomes in pregnant women in the third trimester. *North Clin Istanbul*. 2019 Sep 2;6(3):267-272. doi: 10.14744/nci.2018.51422. PMID: 31650114; PMCID: PMC6790929.
9. Amouzegar A, Mehran L, Sarvghadi F, Delshad H, Azizi F, Lazarus JH. Comparison of the American Thyroid Association with the Endocrine Society practice guidelines for the screening and treatment of hypothyroidism during pregnancy. *Hormones (Athens)* 2014; 13: 307-313 [PMID: 25079454 DOI: 10.14310/horm.2002.1486]
10. Mirghani Dirar A et al. Hypothyroidism during pregnancy. *WJOG*. July 10, 2018; 7(1): 1-16 [DOI: 10.5317/wjog.v7.i1.1]
11. Rodrigo Moreno-Reyes et.al. High Prevalence of Thyroid Disorders in Pregnant Women in a Mildly Iodine-deficient Country: A Population-Based Study. *J Clin Endocrinol Metab*, September 2013, 98(9):3694–3701 [DOI: 10.1210/jc.2013-2149]
12. Sletner L, Jenum AK, Qvigstad E, Hammerstad SS. Thyroid Function During Pregnancy in A Multiethnic Population in Norway. *J Endocr Soc*. 2021 May 4;5(7):bvab078. doi: 10.1210/jendso/bvab078. PMID: 34159284; PMCID: PMC8212686.
13. Korevaar TIM, Medici M, Visser TJ, Peeters RP. Thyroid disease in pregnancy: new insights in diagnosis and clinical management. *Nat Rev Endocrinol*. (2017) 13:610–22. doi: 10.1038/nrendo.2017.93
14. Díez JJ, et al. Disfunción tiroidea y embarazo. *MedClin(Barc)* 2014
15. Haddow JE, Palomaki GE, Allan WC, Williams JR, Knight GJ, Gagnon J, et al. Maternal thyroid deficiency during pregnancy and subsequent neuropsychological development of the child. *N Engl J Med*. 1999; 341:549-55
16. Wasserman EE, Nelson K, Rose NR et al. Maternal thyroid autoantibodies during the third trimester and hearing deficits in children: an epidemiologic assessment. *Am J Epidemiol* 2008; 2009; 94:772-79
17. Sepasi, F., Rashidian, T., Shokri, M. et al. Thyroid dysfunction in Iranian pregnant women: a systematic review and meta-analysis. *BMC Pregnancy Childbirth* 20, 405 (2020). <https://doi.org/10.1186/s12884-020-03040-5>
18. Siscart J, Orós M, Serna MC, Perejón D, Galván L, Ortega M. Adherence to treatment for hypothyroidism in pregnancy and relationship with thyrotropin control: a retrospective observational cohort study. *BMC Pregnancy Childbirth*. 2022 Mar 1;22(1):168. doi: 10.1186/s12884-022-04483-8. PMID: 35232385; PMCID: PMC8886742.
19. Cruz I, Serna C, Rué M, Real J, Soler-Gonzalez J, Galván L. Duration and compliance with antidepressant treatment in immigrant and native-born populations in Spain: a four year follow-up descriptive study. *BMC Public Health*. 2012 May 11;12:256. doi: 10.1186/1471-2458-12-256. PMID: 22469197; PMCID: PMC3350418.
20. Li, G., Xing, Y., Wang, G. et al. Differential effect of pre-pregnancy low BMI on fetal macrosomia: a population-based cohort study. *BMC Med* 19, 175 (2021). <https://doi.org/10.1186/s12916-021-02046-w>

21. Aulinas A, Biagetti B, Vinagre I, Capel I, Ubeda J, María MÁ, García-Patterson A, Adelantado JM, Ginovart G, Corcoy R. Diabetes mellitus gestacional y etnia materna: alta prevalencia de macrosomía fetal en mujeres no caucásicas [Gestational diabetes mellitus and maternal ethnicity: high prevalence of fetal macrosomia in non-Caucasian women]. *Med Clin (Barc)*. 2013 Sep 21;141(6):240-5. Spanish. doi: 10.1016/j.medcli.2012.05.034. Epub 2012 Jul 28. PMID: 22841465.
22. Pillai, Nancy & Bennet, Jemela. (2018). Prevalence of hypothyroidism amongst pregnant women: a study done in rural set up. *International Journal of Reproduction, Contraception, Obstetrics and Gynecology*. 7. 1586. 10.18203/2320-1770.ijrcog20181360.
23. Sletner L, Jenum AK, Qvigstad E, Hammerstad SS. Thyroid Function During Pregnancy in A Multiethnic Population in Norway. *J Endocr Soc*. 2021 May 4;5(7):bvab078. doi: 10.1210/jendso/bvab078. PMID: 34159284; PMCID: PMC8212686.
24. American Thyroid Association. Consensus Statement #2: American Thyroid Association statement on early maternal thyroidal insufficiency: recognition, clinical management and research directions. *Thyroid* 2005;15:77–9
25. Alexander EK, Pearce EN, Brent GA, Brown RS, Chen H, Dosiou C, Grobman WA, Laurberg P, Lazarus JH, Mandel SJ, Peeters RP, Sullivan S. 2017 Guidelines of the American Thyroid Association for the Diagnosis and Management of Thyroid Disease During Pregnancy and the Postpartum. *Thyroid*. 2017 Mar;27(3):315-389. doi: 10.1089/thy.2016.0457. Erratum in: *Thyroid*. 2017 Sep;27(9):1212. PMID: 28056690.
26. Biondi B, Cappola AR, Cooper DS. Subclinical Hypothyroidism: A Review. *JAMA*. 2019 Jul 9;322(2):153-160. doi: 10.1001/jama.2019.9052. PMID: 31287527.
27. Caputo, M., Pecere, A., Sarro, A. *et al*. Incidence and prevalence of hyperthyroidism: a population-based study in the Piedmont Region, Italy. *Endocrine* 69, 107–112 (2020). <https://doi.org/10.1007/s12020-020-02222-7>
28. Leng, O., Razvi, S. Hypothyroidism in the older population. *Thyroid Res* 12, 2 (2019). <https://doi.org/10.1186/s13044-019-0063-3>
29. Ajmani SN, Aggarwal D, Bhatia P, Sharma M, Sarabhai V, Paul M. Prevalence of overt and subclinical thyroid dysfunction among pregnant women and its effect on maternal and fetal outcome. *J Obstet Gynecol India*. 2014;64(2):105-10
30. Gupta P, Jain M, Verma V, Gupta NK. The Study of Prevalence and Pattern of Thyroid Disorder in Pregnant Women: A Prospective Study. *Cureus*. 2021 Jul 18;13(7):e16457. doi: 10.7759/cureus.16457. PMID: 34422486; PMCID: PMC8369967.
31. Cappola AR, Ladenson PW. Hypothyroidism and atherosclerosis. *J Clin Endocrinol Metab*. (2003) 88:2438–44. doi: 10.1210/jc.2003-030398
32. Berta E, Lengyel I, Halmi S, Zrínyi M, Erdei A, Harangi M, Páll D, Nagy EV, Bodor M. Hypertension in Thyroid Disorders. *Front Endocrinol (Lausanne)*. 2019 Jul 17;10:482. doi: 10.3389/fendo.2019.00482. PMID: 31379748; PMCID: PMC6652798.
33. Han Y, Wang J, Wang X, Ouyang L, Li Y. Relationship Between Subclinical Hypothyroidism in Pregnancy and Hypertensive Disorder of Pregnancy: A Systematic Review and Meta-Analysis. *Front Endocrinol (Lausanne)*. 2022 Mar 8;13:823710. doi: 10.3389/fendo.2022.823710. PMID: 35355565; PMCID: PMC8959212.

34. Li G, Liu Y, Su X, Huang S, Liu X, Du Q. Effect of Levothyroxine on Pregnancy Outcomes in Pregnant Women With Hypothyroxinemia: An Interventional Study. *Front Endocrinol (Lausanne)*. 2022 Apr 19;13:874975. doi: 10.3389/fendo.2022.874975. PMID: 35518923; PMCID: PMC9062082.
35. Chen, Rong-Hsing MD, MSca; Chen, Huey-Yi MD, PhDa,b; Man, Kee-Ming MDa,b,c; Chen, Szu-Ju MDa,d; Chen, Weishan PhDe; Liu, Po-Len PhDf; Chen, Yung-Hsiang PhDa,b,g,\*; Chen, Wen-Chi MD, PhDa,b,\* Thyroid diseases increased the risk of type 2 diabetes mellitus, *Medicine*: May 2019 - Volume 98 - Issue 20 - p e15631 doi: 10.1097/MD.00000000000015631
36. Alsolami AA, Alshali KZ, Albeshri MA, et al. Association between type 2 diabetes mellitus and hypothyroidism: a case-control study. *Int J Gen Med*. 2018;11:457-461. Published 2018 Dec 4. doi:10.2147/IJGM.S179205
37. Dey A, Kanneganti V, Das D. A study of the cardiac risk factors emerging out of subclinical hypothyroidism. *J Family Med Prim Care*. 2019;8(7):2439-2444. doi:10.4103/jfmpc.jfmpc\_348\_19
38. Barišić T, Mandić V, Vasilj A, Tiric D. Higher levels of thyrotropin in pregnancy and adverse pregnancy outcomes. *J Matern Fetal Neonatal Med*. 2019 Sep;32(17):2883-2888. doi: 10.1080/14767058.2018.1451509. Epub 2018 Mar 26. PMID: 29540085

21375 pregnant women who gave birth at the Arnau de Vilanova Hospital in Lleida

1625 pregnant women who did not have a personal identification code (CIP) and  
2573 whose Medical history was missing multiple data

17177 pregnant women studied

Figure 1. Sample of pregnant women studied.

Figure 2. Multivariate analysis of the prevalence of hypothyroidism and its association with other predictor variables.

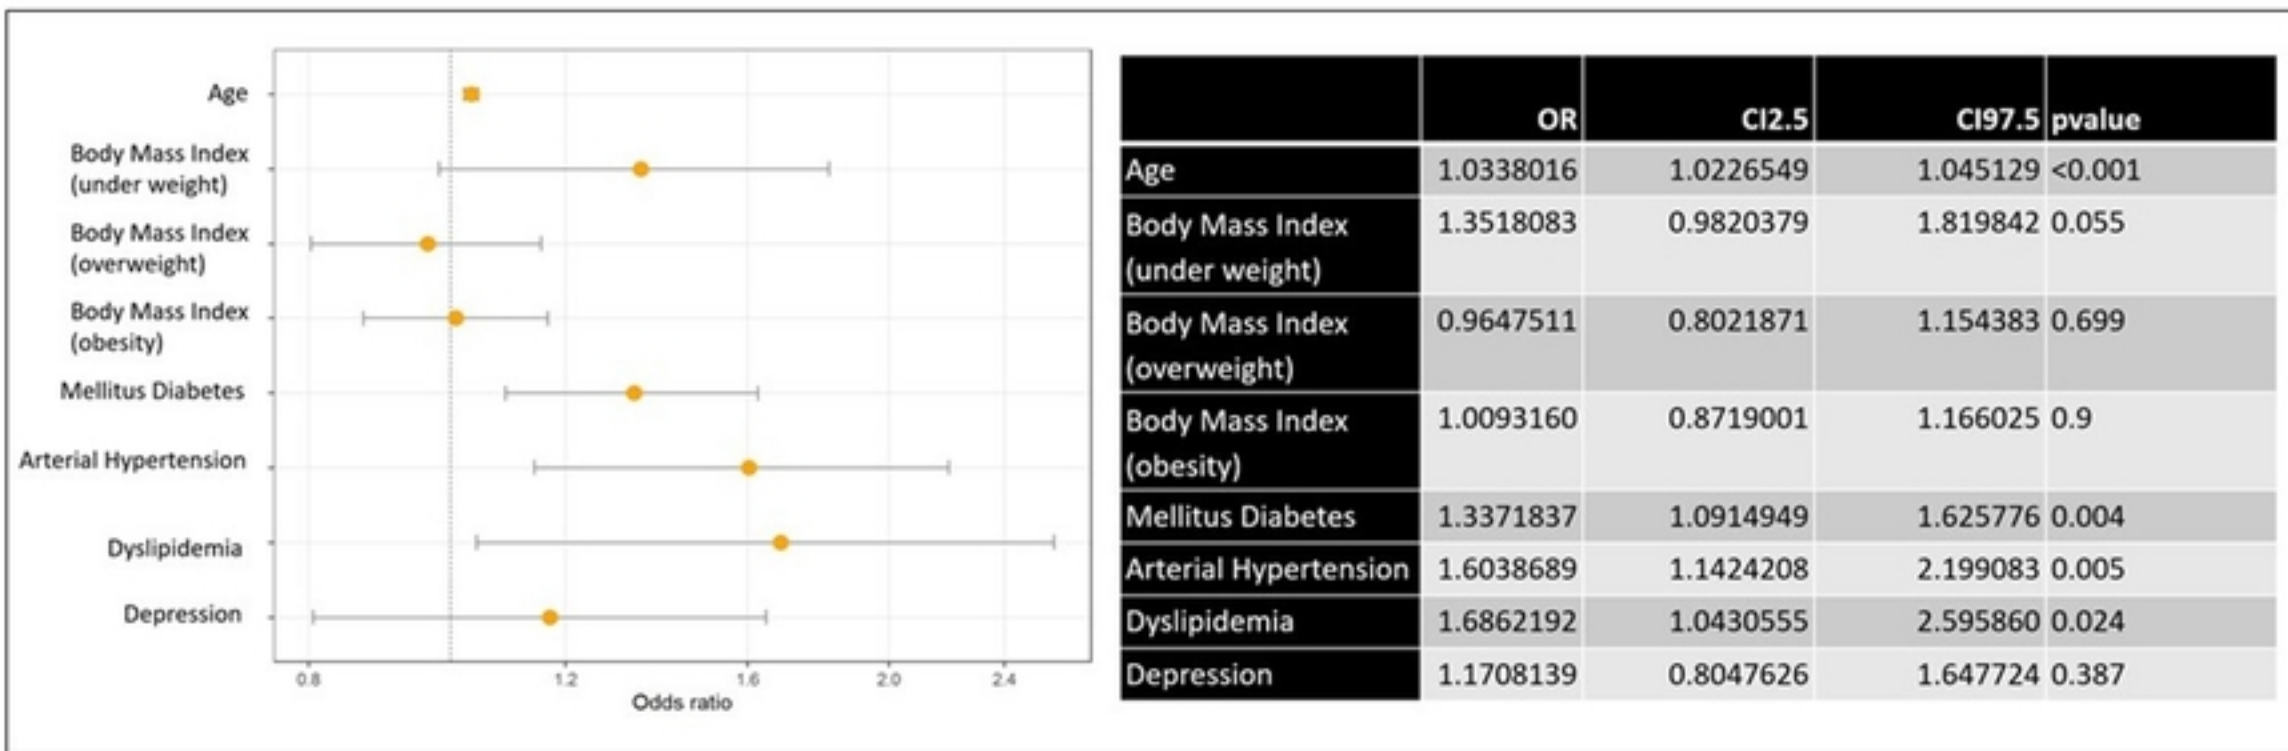

Figure



Figure 3. Multivariate analysis of the association of maternal and fetal risk factors in women with hypothyroidism.

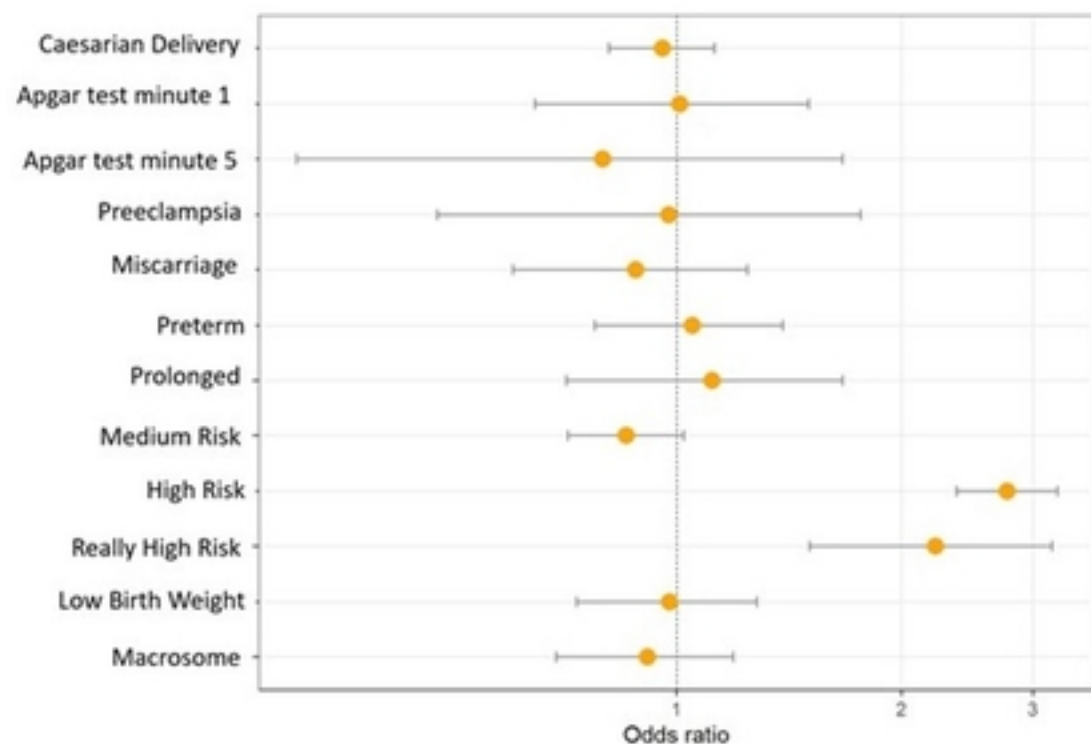

|                     | OR        | CI 2.5    | CI 97.5  | pvalue |
|---------------------|-----------|-----------|----------|--------|
| Caesarian Delivery  | 0.9581957 | 0.8120940 | 1.124915 | 0.607  |
| Apgar test minute 1 | 1.0112930 | 0.6476806 | 1.504284 | 0.958  |
| Apgar test minute 5 | 0.7963887 | 0.3106393 | 1.665917 | 0.589  |
| Preeclampsia        | 0.9758111 | 0.4793796 | 1.763085 | 0.941  |
| Miscarriage         | 0.8832793 | 0.6051177 | 1.245177 | 0.499  |
| Preterm             | 1.0504161 | 0.7781904 | 1.388679 | 0.739  |
| Prolonged           | 1.1168003 | 0.7134498 | 1.666676 | 0.608  |
| Medium Risk         | 0.8575011 | 0.7168018 | 1.022809 | 0.09   |
| High Risk           | 2.7662442 | 2.3706786 | 3.226725 | <0.001 |
| Really High Risk    | 2.2192862 | 1.5072443 | 3.175185 | <0.001 |
| Low Birth Weight    | 0.9800525 | 0.7348801 | 1.281747 | 0.887  |
| Macrosome           | 0.9147952 | 0.6904263 | 1.189990 | 0.521  |

Figure
